2. Maduska AL: Serum inorganic fluoride levels in patients receiving enflurane anesthesia. *Anesth Analg* 53:351-353, 1974
3. Greenstein LR, Hitt BA, Mazze RI: *In vitro* metabolism of enflurane, isoflurane and methoxyflurane. *ANESTHESIOLOGY* 42:420-424, 1975
4. Harnett MN, Lane W, Bennett WM: Non-oliguric renal failure and enflurane. *Ann Intern Med* 81:560, 1974
5. Loehning R, Mazze RI: Possible nephrotoxicity from enflurane in a patient with severe renal disease. *ANESTHESIOLOGY* 40:203-205, 1974
6. Eichhorn JH, Hedley-Whyte J, Steinman TI, Kaufmann JM, Laasberg LH: Renal failure following enflurane anesthesia. *ANESTHESIOLOGY* 45:557-560, 1976
7. Cousins MJ, Greenstein LR, Hitt BA, Mazze RI: Metabolism and renal effect of enflurane in man. *ANESTHESIOLOGY* 44:44-53, 1976
8. Ganz SA: Experiments when each subject receives more than one treatment, *Primer of Biostatistics*. New York, McGraw-Hill, 1981, pp 229-261
9. Mazze RI, Calverley RK, Smith NT: Inorganic fluoride nephrotoxicity: Prolonged enflurane and halothane anesthesia in volunteers. *ANESTHESIOLOGY* 46:265-271, 1977
10. Cousins MJ, Mazze RI: Methoxyflurane nephrotoxicity: A study of dose response in man. *JAMA* 225:1611-1616, 1973.
11. Sievenpiper TS, Rice SA, McClendon F, Kosek JC, Mazze RI: Renal effects of enflurane anesthesia in Fischer 344 rats with pre-existing renal insufficiency. *J Pharmacol Exp Ther* 211:36-41, 1979
12. Fish K, Sievenpiper T, Rice SA, Wharton RS, Mazze RI: Renal function in Fischer 344 rats with chronic renal impairment after administration of enflurane and gentamicin. *ANESTHESIOLOGY* 53:481-488, 1980
13. Carter R, Heerdt M, Acchiardo S: Fluoride kinetics after enflurane anesthesia in healthy and anephric patients and in patients with poor renal function. *Clin Pharmacol Exp Ther* 20:565-570, 1976
14. Ekstrand J, Ehrnebo M, Boreus LO: Fluoride bioavailability after intravenous and oral administration: Importance of renal clearances and urine flow. *Clin Pharmacol Ther* 23:329-337, 1978
15. Largent EJ: The metabolism of fluorides in man. *AMA Arch Ind Health* 21:318-323, 1960
16. Armstrong WD, Cedalia I, Singer L, Weatherel JA, Weidmann SM: Distribution of fluorides, Fluorides and Human Health, WHO Monograph Series, no. 59, Geneva, 1970, pp 93-139
17. Ericsson Y, Ulberg S: Autoradiographic investigations of the distribution of  $^{18}\text{F}$  in mice and rats. *Acta Odontol Scand* 16:362-374, 1958
18. Hasking DJ, Chamberlain MJ: Studies in man with  $^{17}\text{F}$ . *Clinical Sci* 42:153-161, 1972
19. Dooley JR, Mazze FI, Rice SA, Borel JD: Is enflurane defluorination inducible in man? *ANESTHESIOLOGY* 50:213-217, 1979
20. Mazze RI, Woodruff RE, Heerdt ME: Isoniazid-induced enflurane defluorination in humans. *ANESTHESIOLOGY* 57:5-8, 1982

Anesthesiology  
60:163-165, 1984

## Noncardiogenic Pulmonary Edema Following Laryngeal Obstruction

CHARLES WEISSMAN, M.D.,\* MICHAEL C. DAMASK, M.D.,† JOSEPH YANG, M.D.†

Pulmonary edema is a recognized complication of acute upper airway obstruction, especially in the pediatric population.<sup>1,2</sup> Interestingly, when pulmonary edema occurs, it usually follows relief of the obstruction. We present a case of noncardiogenic pulmonary edema that occurred in an adult patient after the treatment of upper airway obstruction following extubation of the trachea caused by a combination of laryngospasm and laryngeal edema.

### REPORT OF A CASE

A 46-year-old man was admitted for an elective total hip arthroplasty. He had been in good health except for degenerative arthritis of both hips. Preoperatively, he had a hematocrit of 46%, total protein of 7.2

mg/dl, serum albumin of 4.1 mg/dl and a  $\text{pH}_a$  7.43,  $\text{PaCO}_2$  35 mmHg, and  $\text{PaO}_2$  87 mmHg, with a  $\text{FI}_{\text{O}_2}$  of 0.2. Anesthesia was induced with diazepam 5 mg, thiopental 275 mg, and succinylcholine 120 mg, iv. The trachea was intubated easily with an 8-mm cuffed portex tube. Anesthesia was maintained with 70% nitrous oxide and 1.0% isoflurane along with 16 mg metocurine iv. Cephalosporin 1.0 g was administered iv at the beginning of the 4-hour surgery. Blood loss was estimated at 600 ml; the patient received 4 l lactated Ringer's solution iv. At the end of the procedure, the paralysis was reversed with 2.5 mg of neostigmine and 0.5 mg glycopyrrolate iv. The trachea was extubated uneventfully with an end-tidal  $\text{PCO}_2$  of 38 mmHg. On admission to the recovery room, stridor, marked abdominal excursions, and intercostal retractions were evident with little movement of air. Ventilatory assistance was initiated with mask and Ambu-bag. Physical examination revealed no evidence of neuromuscular blockade and nerve stimulation revealed no posttetanic facilitation or fade in response to a tetanic stimulus. Because ventilation remained difficult to achieve with the mask and Ambu-bag, 40 mg of succinylcholine was administered iv with a partial resolution of the apparent upper airway obstruction,  $\text{pH}_a$  was 7.15,  $\text{PaCO}_2$  61 mmHg, and  $\text{PaO}_2$  160 mmHg. After the return of muscle function, audible grunting and stridor again were noted, along with a rocking respiratory motion,  $\text{pH}_a$  was then 7.17,  $\text{PaO}_2$  57 mmHg, and  $\text{PaO}_2$  114 mmHg (with a  $\text{FI}_{\text{O}_2}$  of 0.50-80). We decided to reintubate the trachea. During direct laryngoscopy following the administration of a second dose (40 mg) of succinylcholine iv, the vocal cords were closed, reddened, and edematous. Attempts to insert

\* Academic rank for Dr. Weissman, Critical Care Fellow, Department of Anesthesiology.

† Assistant Professor, Department of Anesthesiology.

Received from the Department of Anesthesiology, Columbia University College of Physicians and Surgeons, New York, New York 10032.

Address reprints requests to Dr. Weissman: Department of Anesthesiology, Columbia-Presbyterian Medical Center, 622 West 168th Street, New York, New York 10032.

Key words: Airway: obstruction. Lungs: edema, noncardiac.

TABLE 1. Respiratory and Hemodynamic Parameters

| Time       | Vent        | FI <sub>O<sub>2</sub></sub> | PEEP<br>(cmH <sub>2</sub> O) | V <sub>T</sub><br>(ml) | f<br>(bpm) | pH <sub>a</sub> | PaCO <sub>2</sub><br>(mmHg) | PaO <sub>2</sub><br>(mmHg) | CVP<br>(mmHg) | PAP<br>(mmHg) | PCWP<br>(mmHg) |
|------------|-------------|-----------------------------|------------------------------|------------------------|------------|-----------------|-----------------------------|----------------------------|---------------|---------------|----------------|
| Pre-op     | Spont       | Ra (0.21)                   |                              |                        |            | 7.43            | 35                          | 87                         |               |               |                |
| 12 Noon    | Ambu ± Mask | 0.50-0.80                   |                              |                        |            | 7.15            | 61                          | 160                        |               |               |                |
| 01:45 P.M. | IMV         | 1.0                         | 3                            | 800                    | 15         | 7.26            | 48                          | 74                         | 10            | 30/17         | 7              |
| 02:30 P.M. | IMV         | 1.0                         | 10                           | 900                    | 15         | 7.28            | 45                          | 280                        |               |               |                |
| 03:10 P.M. | IMV         | 0.7                         | 10                           | 900                    | 15         | 7.32            | 37                          | 126                        | 9             | 28/16         | 7              |
| 04:20 P.M. | IMV         | 0.6                         | 10                           | 900                    | 15         | 7.32            | 43                          | 99                         |               |               |                |
| 06:30 P.M. | IMV         | 0.6                         | 10                           | 900                    | 15         | 7.34            | 44                          | 103                        | 10            | 22/15         | 8              |
| 10:30 P.M. | IMV         | 0.4                         | 12                           | 900                    | 10         | 7.36            | 41                          | 122                        | 9             | 18/11         |                |
| 03:00 A.M. | IMV         | 0.4                         | 12                           | 900                    | 10         | 7.42            | 37                          | 152                        | 9-10          | 18/11         | 9-10           |
| 05:00 A.M. | IMV         | 0.4                         | 6                            | 900                    | 10         | 7.42            | 37                          | 138                        | 4             | 15/07         | 5              |
| 07:00 A.M. | IMV         | 0.4                         | 3                            | 900                    | 18         | 7.36            | 46                          | 112                        | 3             | 12/08         | 5              |
| 10:00 A.M. | FM          | 1.0                         |                              |                        |            | 7.37            | 45                          | 187                        | 2             | 14/06         | 5              |
| 11:00 A.M. | FM          | 0.5                         |                              |                        |            | 7.35            | 50                          | 146                        | 2             | 15/07         | 4-5            |

RA = room air; FM = face mask; V<sub>T</sub> = tidal volume; CV = controlled ventilation; f = frequency; IMV = intermittent mandatory ventilation.

first an 8-mm and then a 7-mm endotracheal tube with a stylet past the vocal cords were initially unsuccessful. An additional 80 mg of succinylcholine was administered iv and an 8-mm endotracheal tube then was inserted successfully into the trachea. Ventilation then was controlled using a respirator with an FI<sub>O<sub>2</sub></sub> of 1.0, a tidal volume (V<sub>T</sub>) of 800 ml, rate of 10 breaths·min<sup>-1</sup>, and a PEEP of 3-5 cmH<sub>2</sub>O. Hydrocortisone 200 mg iv was administered to reduce the laryngeal edema. Thirty minutes after reintubation of the trachea, the PaO<sub>2</sub> was 74 mmHg (FI<sub>O<sub>2</sub></sub> = 1.0). At this point, frothy pink fluid emerged from the endotracheal tube. A chest roentgenogram showed proper location of the endotracheal tube and a diffuse homogenous alveolar infiltrate. A pulmonary artery catheter was inserted and revealed a central venous pressure (CVP) of 10 mmHg, pulmonary artery pressure (PAP) of 30/17 mmHg, and a pulmonary capillary wedge pressure (PCWP) of 7 mmHg. PEEP was increased to 10 cmH<sub>2</sub>O, and V<sub>T</sub> to 900 ml, PaO<sub>2</sub> increased to 280 mmHg (FI<sub>O<sub>2</sub></sub> = 1.0) with a peak inspiratory pressure (proximal airway) of 30 cmH<sub>2</sub>O. Over the next few hours, the FI<sub>O<sub>2</sub></sub> was reduced slowly (table 1). Chest roentgenogram showed the pulmonary artery catheter tip in the right pulmonary artery, while the homogeneous alveolar infiltrate persisted. Serum albumin and total protein were 2.6 g/dl and 4.8 g/dl, respectively. The PEEP and FI<sub>O<sub>2</sub></sub> both were decreased successfully (table 1). The PAP, PCWP, and CVP and the pulmonary artery diastolic pressure (PADP) pulmonary capillary wedge pressure gradient decreased slowly (table 1). A chest roentgenogram taken on the following morning showed that the alveolar infiltrate had cleared completely and arterial blood gases had improved (table 1). The trachea was extubated after markedly reduced laryngeal edema was observed. No further problems were encountered after extubation. He made an uneventful recovery and was discharged on the 16th hospital day.

## DISCUSSION

Pulmonary edema can follow the relief of an acute upper airway obstruction. This syndrome has appeared in young children (ages 1-5 years) with epiglottitis and laryngotracheobronchitis.<sup>1,2</sup> These patients, like our patient, became hypoxemic and displayed the clinical and radiologic signs of pulmonary edema soon after relief of their airway obstruction. Four similar cases have been reported in adults.<sup>3,4</sup> However, no attempt was made to characterize the pulmonary edema as either cardiogenic or noncardiogenic.

In our case, pulmonary edema followed a severe ep-

isode of extubation of the trachea for relief of upper airway obstruction. The obstruction appears to have been due to a combination of laryngeal edema (noted on direct laryngoscopy) and laryngospasm as evidenced by the patient's response to a dose of succinylcholine. This case is interesting because of the rapid onset and rapid resolution of the pulmonary edema. Within 16 to 18 hours, the radiographic abnormalities had resolved completely, while the pulmonary artery pressures decreased as did the PADP-PCWP gradient. Most importantly, oxygenation had improved sufficiently to allow extubation of the trachea.

We believe that this self-limited pulmonary edema probably was brought on by upper airway obstruction. Nonetheless, other possible causes of pulmonary edema were investigated. Since the patient had undergone major long bone surgery, fat embolism may have occurred. We found no evidence of urinary fat globules (although their absence does not exclude the possibility of fat emboli)<sup>6</sup> or other symptoms of fat emboli such as petechiae, thrombocytopenia, mental disturbances, and unexplained anemia.<sup>7,8</sup> Furthermore, the extremely short duration of the pulmonary edema is not typical of the fat emboli syndrome.<sup>6,7</sup> An allergic reaction is another possible cause of pulmonary edema,<sup>9</sup> but the usual signs of this diagnosis were not noted at any time during the perioperative period.

The hemodynamic data suggest that our patient had noncardiogenic pulmonary edema. A pulmonary artery occlusion pressure of 7 mmHg was measured while ventilation was controlled with a PEEP of 10 mmHg.<sup>10</sup> This confirmed that the patient had low pulmonary vascular hydrostatic pressures. With the PCWP of 7 mmHg and an albumin of about 3 mg/dl, the edema was unlikely to be due to a decreased colloid osmotic pressure-pulmonary capillary wedge pressure gradient.

The mechanism by which an upper airway obstruction causes pulmonary edema is not known. Either hydrostatic forces or an increase in capillary permeability are likely

causes. The first theory assigns the development of the edema to negative transpulmonary pressure caused by inspiration against an obstruction.<sup>2,4</sup> This causes the mean transpulmonary pressure to decrease further and results in the transudation of fluid from the pulmonary capillaries into the interstitial and alveolar spaces. Interstitial fluid accumulates so fast that the lymphatics are unable to clear the interstitial space of excess fluid.<sup>4</sup> As the negative transpulmonary pressure returns to normal, the edema should resolve rapidly. Stalcup *et al.*<sup>11</sup> demonstrated in dogs that the amount of pulmonary fluid increases as the mean pleural pressure becomes more negative. The major difficulty with this theory is the timing of the obstruction and edema. The greatest degree of pulmonary dysfunction does not take place during the period of negative transthoracic pressure but rather after the obstruction is released,<sup>1</sup> *i.e.*, once there no longer is a negative pressure. Galvis *et al.*<sup>1</sup> suggested that, while the obstruction exists, expiration against it produces a PEEP-like effect, so that oxygenation is maintained. Once the obstruction is gone, this effect is no longer present and oxygenation deteriorates until the lymphatics have cleared the excess fluid. This mechanism would be consistent with our observations. Our patient's oxygenation deteriorated after the obstruction was relieved, but the deterioration lasted only a short time.

Perhaps the obstruction damaged the capillaries, resulting in increased permeability and the consequent exudation of fluid. A number of recent studies<sup>12-15</sup> on re-expansion pulmonary edema (edema that occurs after a large quantity of air or fluid has been aspirated rapidly from a pneumothorax or pleural effusion) have revealed evidence of increased capillary permeability in both humans<sup>12-14</sup> and animals,<sup>15</sup> although this form of pulmonary edema was thought to be hydrostatic in nature, (*i.e.*, caused by the sudden negative intrapulmonary pressure due to the rapid evacuation of fluid or air).<sup>16-19</sup> The mechanism of this increase in vascular permeability is not yet clear, but evidence from animal experiments suggests that it may be due to mechanical stresses applied to the lungs.<sup>15</sup> In our patient the rapid swings in pressure may have caused similar mechanical stresses, and the pulmonary edema may have been due to increased capillary permeability. Another possible explanation for the pulmonary edema in our case was that it was secondary to hypoxia, a known cause of pulmonary edema of the increased permeability variety.<sup>2</sup>

The protein content of the pulmonary edema fluid was not determined<sup>19</sup>; as a result, it remains unclear whether the edema was due to a transudative hydrostatic process or an exudative one caused by increased permeability.

In summary, we described a case of pulmonary edema of short duration related to an episode of severe acute

airway obstruction. Hemodynamic data indicate that it was of the noncardiogenic variety. It is important to observe patients who have had upper airway obstruction for the development of this complication. If pulmonary edema does develop, it is likely to be of the noncardiogenic type.

## REFERENCES

1. Galvis AG, Stool SE, Bluestone CD: Pulmonary edema following relief of acute upper airway obstruction. *Ann Otol Rhinol Laryngol* 89:124-128, 1980
2. Travis KW, Todres ID, Shannon DC: Pulmonary edema associated with croup and epiglottitis. *Pediatrics* 59:695-698, 1977
3. Oswalt CE, Gates GA, Holmstrom FM: Pulmonary edema as a complication of acute airway obstruction. *Rev Surg* 34:346-347, 1977
4. Jackson FN, Rowland V, Corssen G: Laryngospasm induced pulmonary edema. *Chest* 78:819-921, 1980
5. Buchbinder N, Ganz W: Hemodynamic monitoring: invasive techniques. *ANESTHESIOLOGY* 45:146-155, 1976
6. Lepisto P, Alho A: Diagnostic features of the fat embolism syndrome. *Acta Chir Scand* 141:245-250, 1975
7. Guenter CA, Braun TE: Fat embolism syndrome. Changing prognosis. *Chest* 79:143-145, 1981
8. Alho A: Fat embolism syndrome: etiology, pathogenesis and treatment. *Acta Chir Scand (Suppl)* 499:75-85, 1980
9. Carlson RW, Schaeffer RC Jr, Puri VK, Brennen AP, Weil MH: Hypovolemia and permeability pulmonary edema associated with anaphylaxis. *Crit Care Med* 9:883-885, 1981
10. Greer RT: Interpretation of pulmonary-artery wedge pressure when PEEP is used. *ANESTHESIOLOGY* 46:383-384, 1977
11. Stalcup SA, Mellins RB: Mechanical forces producing pulmonary edema in acute asthma. *N Engl J Med* 297:592-596, 1977
12. Sprung CL, Loewenherz JW, Baier H, Hauser MJ: Evidence for increased permeability in reexpansion pulmonary edema. *Am J Med* 71:497-500, 1981
13. Buczek GB, Grossman RF, Goldberg M: Re-expansion pulmonary edema: Evidence for increased capillary permeability. *Can Med Assoc J* 125:460-461, 1981
14. Marland AM, Glauser FL: Hemodynamic and pulmonary edema protein measurements in a case of reexpansion pulmonary edema. *Chest* 81:250-251, 1982
15. Pavlin DJ, Nersley ML, Cheney FW: Increased pulmonary vascular permeability as a cause of re-expansion edema in rabbits. *Am Rev Respir Dis* 124:422-427, 1981
16. Humphreys RL, Berne AS: Rapid re-expansion of pneumothorax. A cause of unilateral pulmonary edema. *Radiology* 96:509-512, 1970
17. Tranell DH, Thurston JGB: Unilateral pulmonary edema after pleural aspiration. *Lancet* 1:1367-1369, 1970
18. Ziskind MM, Weill H, George RA: Acute pulmonary edema following the treatment of spontaneous pneumothorax with excessive negative intrapleural pressure. *Am Rev Respir Dis* 92:632-636, 1965
19. Poulas GE, Prombonas E: Massive unilateral pulmonary edema as a rapid reexpansion sequel. The post-expansion syndrome. Report of a case and review of the literature. *Scand J Thorac Cardiovasc Surg* 8:67-69, 1974
20. Sprung CL, Rackow EC, Fein AI, Jacob AI, Isikoff SK: The spectrum of pulmonary edema: differentiation of cardiogenic, intermediate and noncardiogenic forms of pulmonary edema. *Am Rev Respir Dis* 124:718-721, 1981
